# Supplementary material for: O antigen restricts lysogenization of non-O157 Escherichia coli strains by Stx-converting bacteriophage phi24B
Source: PubMed Central journal article supplement (PMC7862636; doi:10.1038/s41598-021-82422-x), 2021-02-04
Supplement: 41598_2021_82422_MOESM1_ESM.pdf [file 41598_2021_82422_MOESM1_ESM.pdf]

**O antigen restricts the lysogenization of the non-O157 *Escherichia coli* strains  
by Stx-converting bacteriophage phi24B**

Golomidova A.K.<sup>a</sup>, Efimov A.D.<sup>a</sup>, Kulikov E.E.<sup>a,b</sup>, Kuznetsov A.S.<sup>a,c</sup>, Belalov  
I.Sh.<sup>a</sup>, Letarov A.V.<sup>a,c\*</sup>

<sup>a</sup>*Winogradsky Institute of Microbiology RC Biotechnology RAS, Moscow, Russia*

<sup>b</sup>*Phystech School of Biological and Medical Physics, Moscow Institute of Physics and  
Technology, Moscow, Russia*

<sup>c</sup>*Faculty of Biology, Lomonosov Moscow State University, Moscow, Russia*

*\*Prospekt 60-letiya Oktyabrya 7 bld. 2., 117312, Moscow, Russia. letarov@gmail.com*

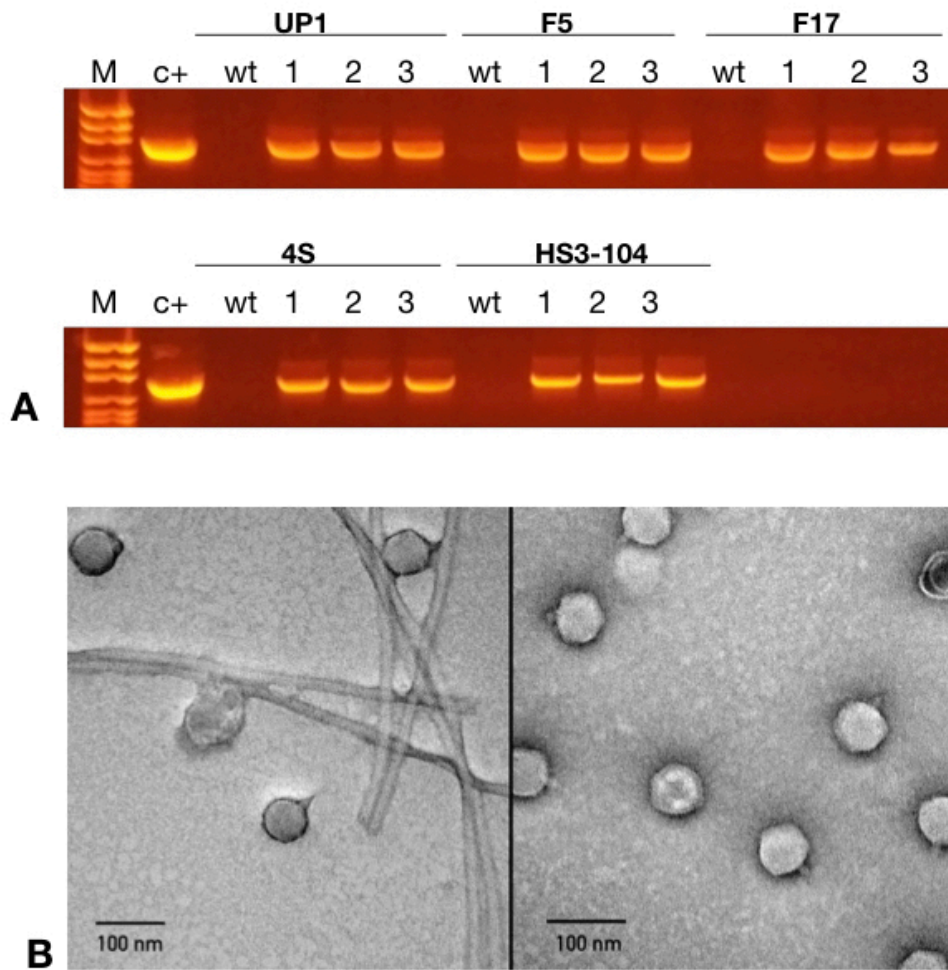

**Supplementary Figure 1.** A. Testing of the host strains and their lysogenic derivatives by the PCR for phi24B g56 sequence. M – marker, c+ – phage 24B, wt – the non-lysogenic culture of the corresponding strain, 1-3 three lysogenic clones of the corresponding strain. B. Morphology of the phage particles obtained by the induction of *E. coli* K12 lysogen (left) and *E. coli* 4s lysogen (right).

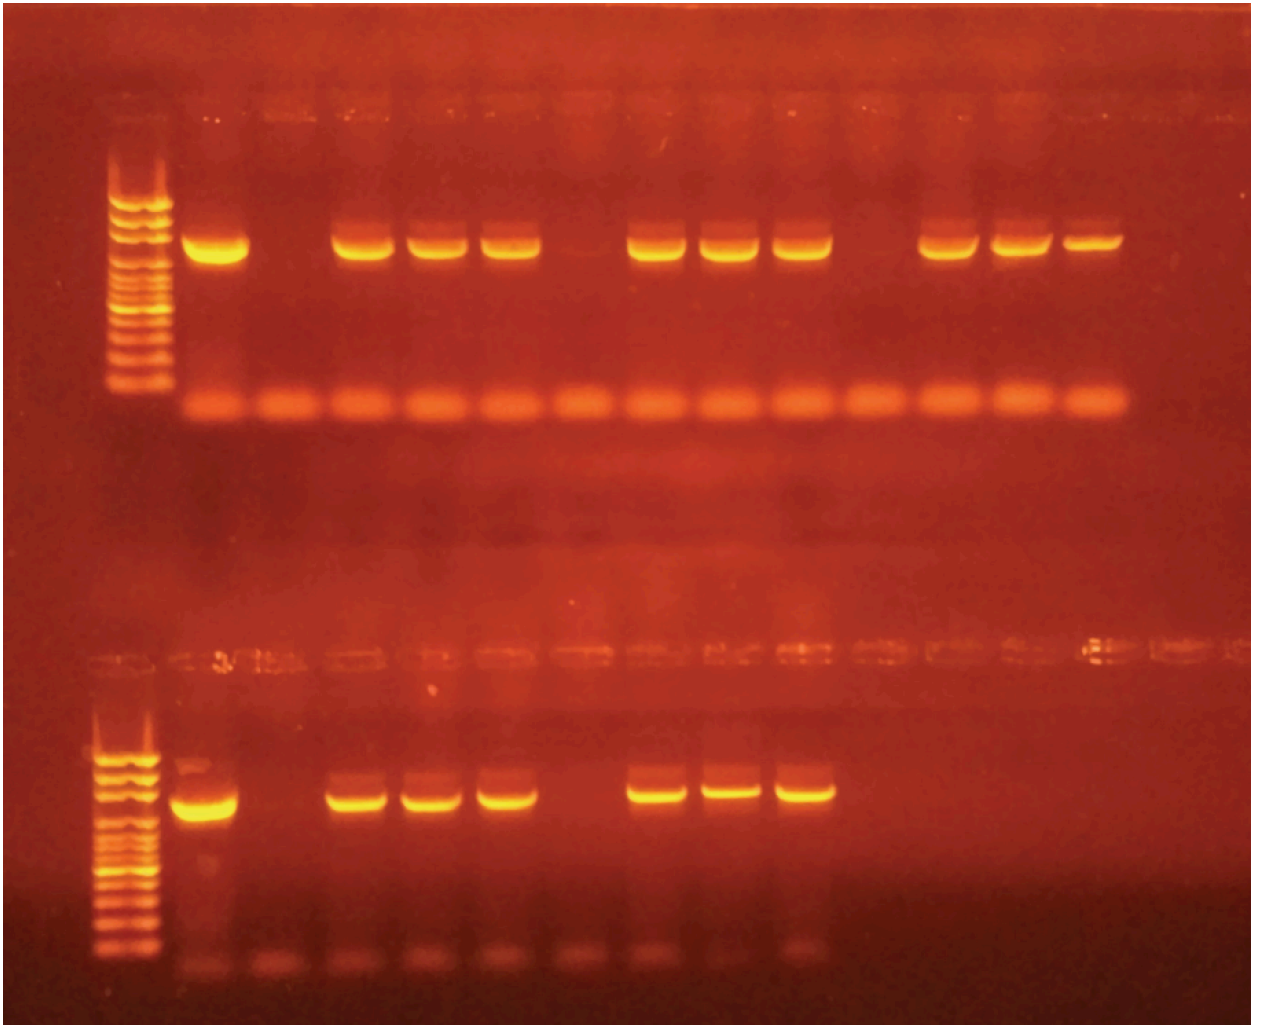

Gel image, used for creation of the **Supplementary Figure 1**

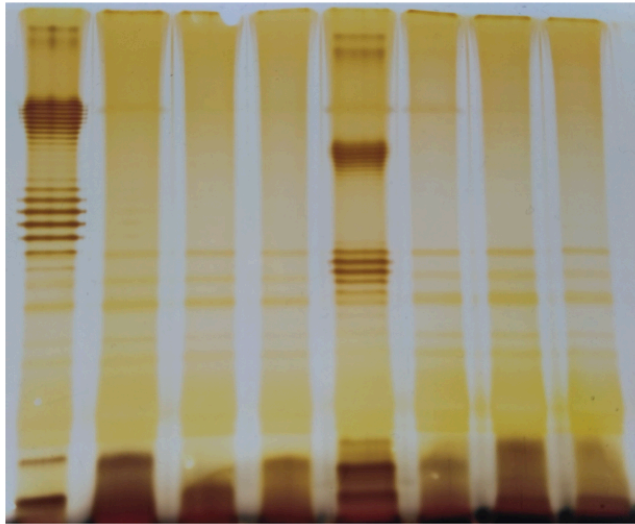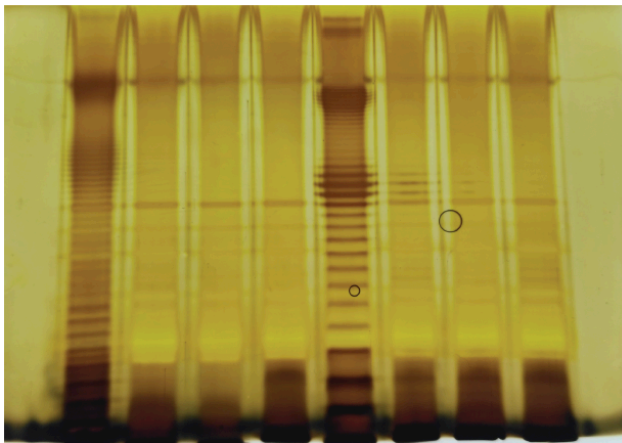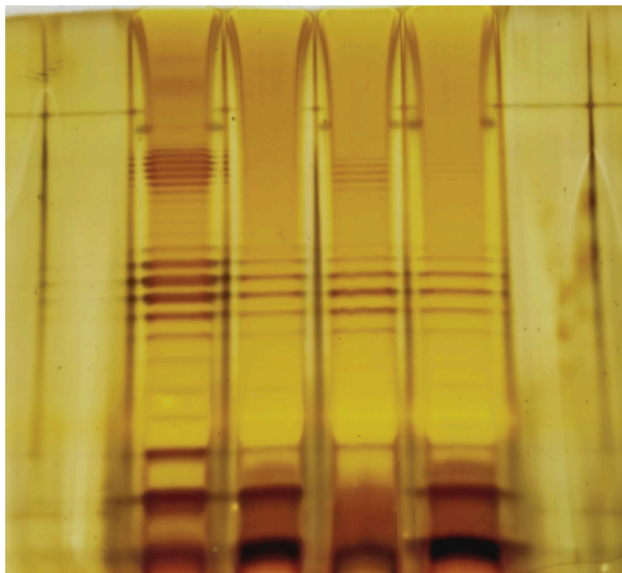

Original gel images, used for cteartion of the **Figure 1**.
